# Supplementary material for: Pronuclear injection-based mouse targeted transgenesis for reproducible and highly efficient transgene expression
Source: PubMed Central journal article supplement — Nucleic Acids Res. 2010 Sep 29;38(22):e198. doi: 10.1093/nar/gkq860 (PMC3001095; doi:10.1093/nar/gkq860), 2010-09-29
Supplement: supp_gkq860_NAR-00811-Met-G-2010-R2-Suppl.pdf [file supp_gkq860_NAR-00811-Met-G-2010-R2-Suppl.pdf]

## SUPPLEMENTARY MATERIAL

## Supplementary Figures

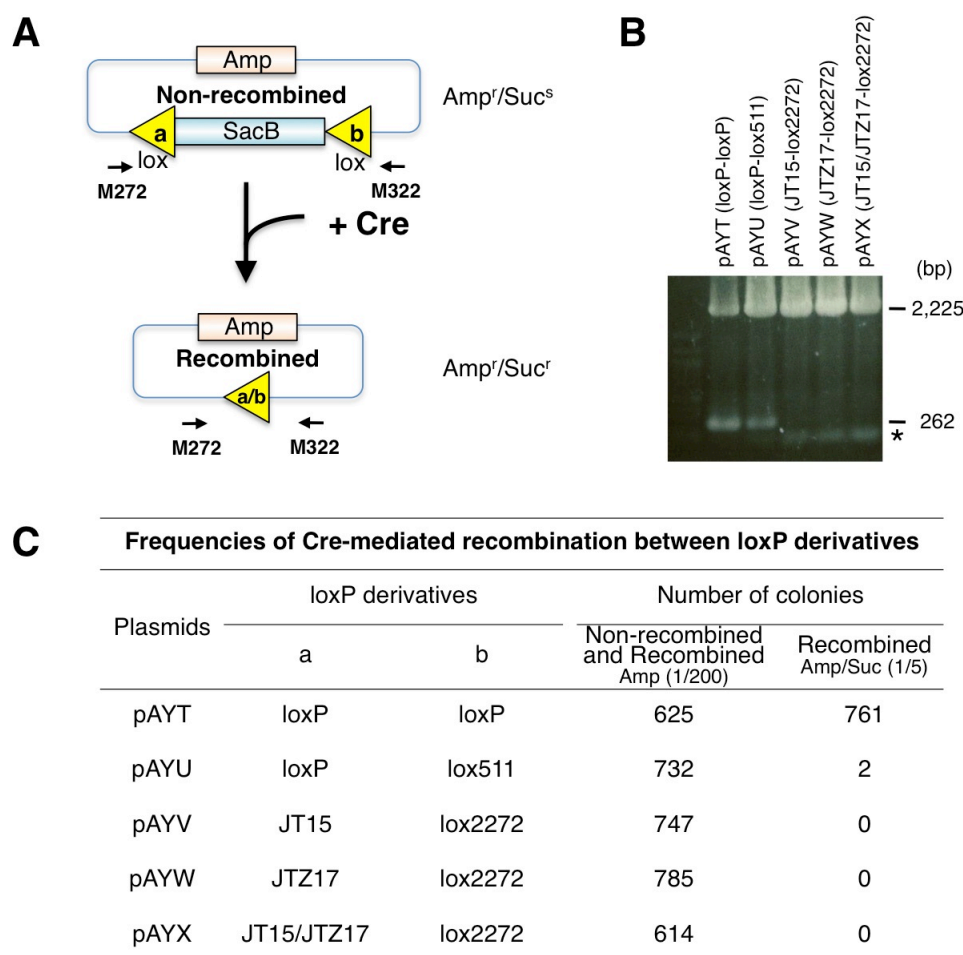

**Supplementary Figure S1.** Presence or absence of Cre-mediated recombination between heterotypic lox sites. (A) Experimental scheme. Non-recombined plasmids containing SacB gene flanked by loxP derivatives (a and b) are ampicillin-resistant and sucrose-sensitive. When recombination takes place between two lox sites (a/b) by Cre enzyme, the resultant recombined plasmids are ampicillin-resistant and sucrose-resistant. Recombination can be detected by PCR with primer set M272 and M322 and/or selection on LB plates containing ampicillin (Amp) and sucrose (Suc).

(B) PCR analysis of Cre-recombination. Each plasmid was treated *in vitro* with Cre enzyme and its reaction mixture was directly subjected to PCR analysis using the primer set shown in A. 2,225 bp and 262 bp bands are amplified from non-recombined and recombined plasmids, respectively. The smaller fragments (asterisk) represent background artificial bands. (C) Frequencies of Cre recombination between loxP derivatives (a and b). In these experiments, 1/200 and 1/50 volumes of transformation mixtures were plated onto Amp and Amp/Suc plates, respectively, and numbers of colonies that appeared subsequently were counted. With regard to the Amp/Suc plates for pAYU, pAYV, pAYW and pAYX, only the numbers of colonies that yielded a 262-bp band by colony PCR are shown, although some background colonies (1 to 7 colonies in each plate) were also noted. With regard to Amp/Suc plates for pAYT, 16 out of the 761 obtained clones were checked by colony PCR, and all amplified the 262-bp fragment. See Materials and Methods section for experimental details.

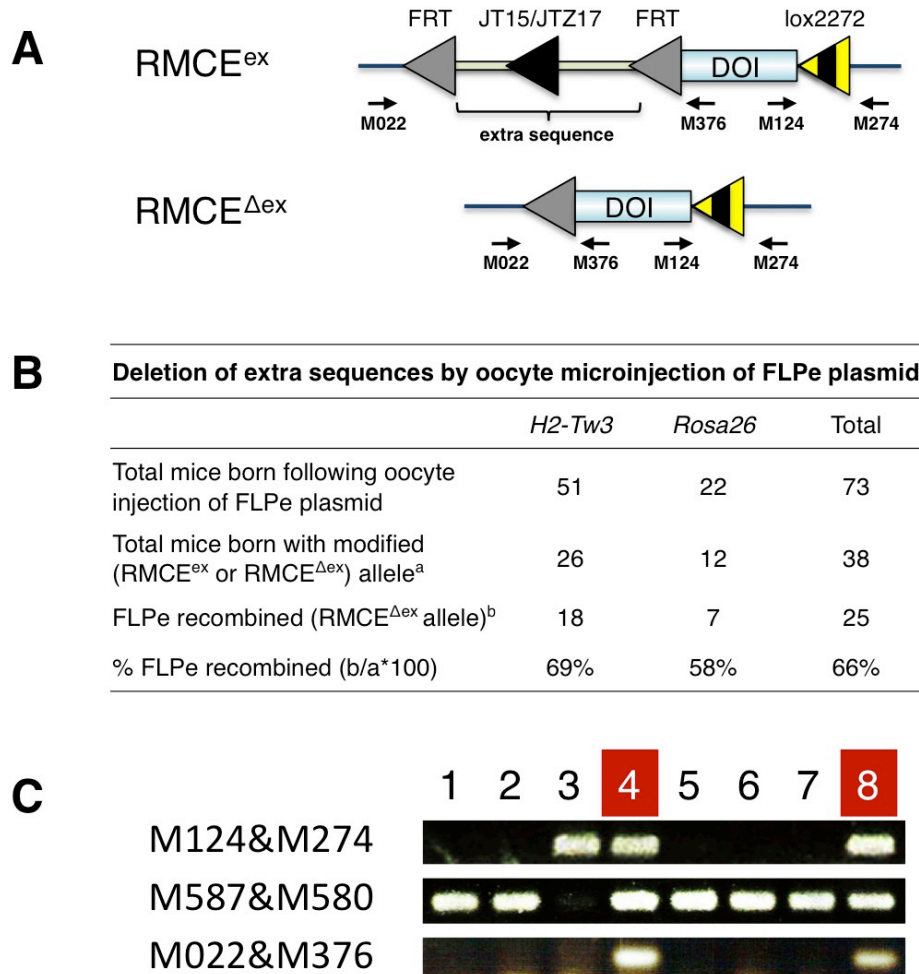

**Supplementary Figure S2.** In vivo FLPe recombination efficiency. **(A)** Schematic diagram of RMCE<sup>ex</sup> allele and RMCE<sup>Δex</sup> allele in the *Rosa26* locus. The extra sequence flanked by FRT in RMCE<sup>ex</sup> allele can be removed by FLPe recombination, generating RMCE<sup>Δex</sup> allele. PCR with M124 and M274 amplified the fragment from both RMCE<sup>ex</sup> and RMCE<sup>Δex</sup> alleles, while that with M022 and M376 amplified the fragment only from RMCE<sup>Δex</sup> allele. DOI: DNA of interest. **(B)** Microinjection of FLPe plasmid into oocytes to remove the FRT-flanked extra sequence in RMCE<sup>ex</sup> allele. **(C)** PCR-based typing of the progeny obtained from the cross between founder mouse and FLPe transgenic mouse. PCR with M587 and M580 amplify the FLPe

transgene. The progeny 4 and 8 indicated in red harbor both the targeted transgene and FLPe transgene.

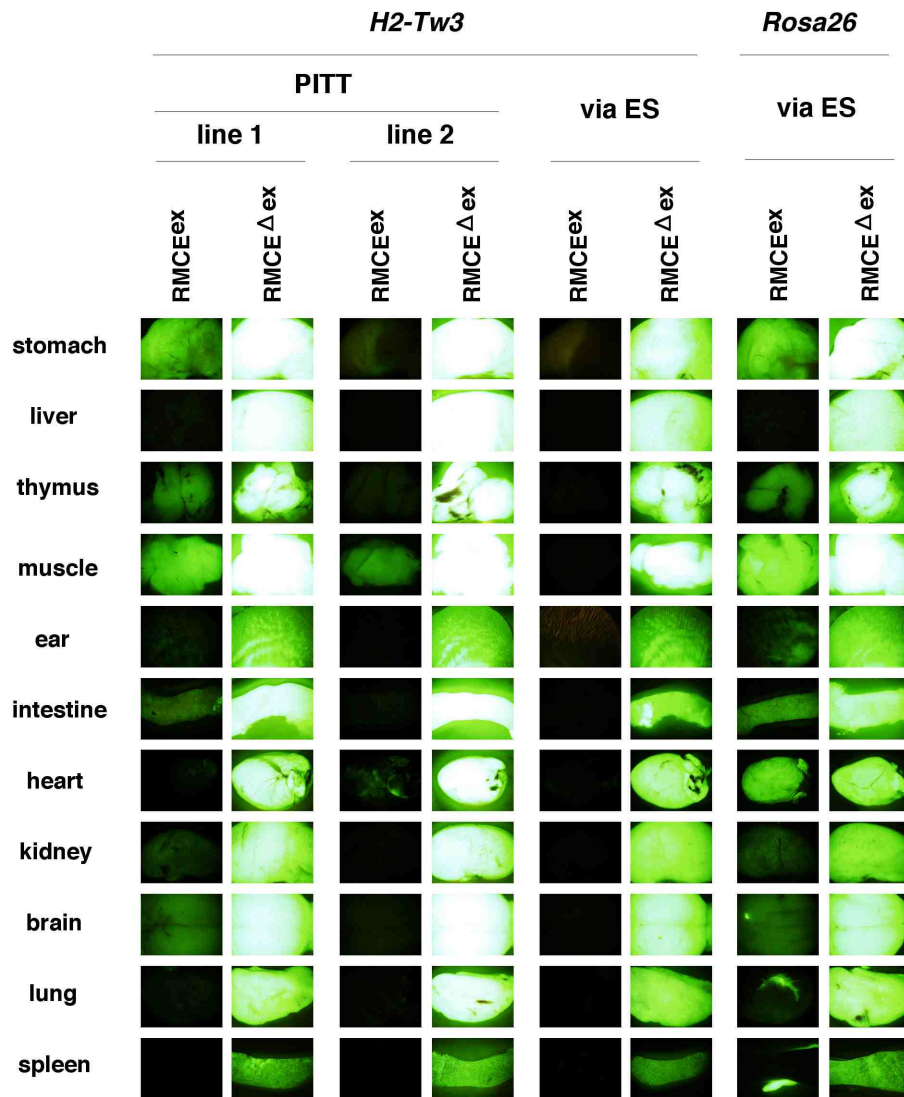

**Supplementary Figure S3.** EGFP fluorescence in tissues of “CAG-EGFP-polyA” transgenic mice generated via RMCE. Expression of EGFP gene was silenced (weak and mosaic) in mice with RMCE<sup>ex</sup> allele. After removal of the extra sequences by FLPe from mice with RMCE<sup>ex</sup> allele, all mice with RMCE<sup>Δex</sup> allele exhibited ubiquitous, stable and strong EGFP expression. With regard to mice generated by PITT, two transgenic lines (lines 1 and 2) derived from different founder mice are shown.

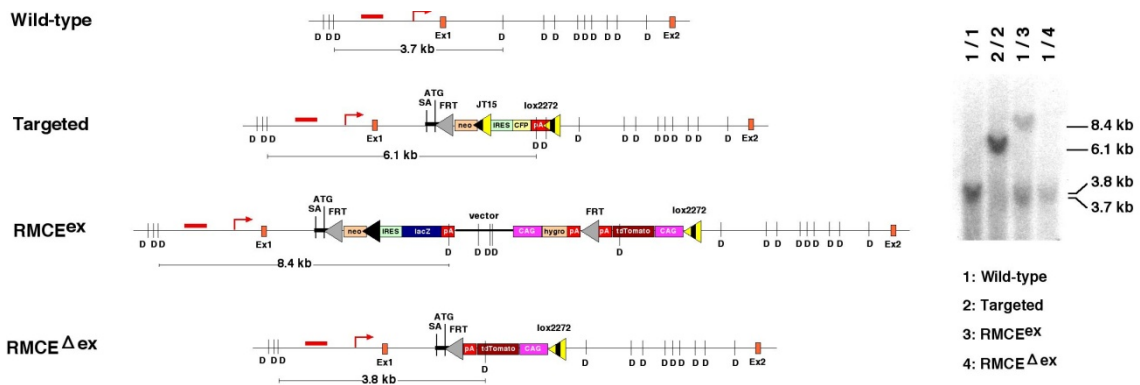

**Supplementary Figure S4.** Examples of mice containing alleles obtained in each step of our method. From top to bottom rows: “wild-type (WT) allele” of *Rosa26* locus, “targeted allele” containing genomically tagged sites, “RMCE<sup>ex</sup> allele” in which pAOM donor plasmid is introduced by PITT and “RMCE<sup>Δex</sup> allele” without extra sequence. The genotype of each allele was analyzed by genomic southern blotting after digestion with *DraI* using the probe marked in red bar. The 8.4 kb fragment from the RMCE<sup>ex</sup> allele indicates correct Cre-mediated recombination at only JT15/JTZ17 site but not at lox2272/lox2272 site. In this RMCE<sup>ex</sup> mouse, correct recombination at lox2272/lox2272 site was confirmed by PCR that amplified the junction region. D: *DraI* site.

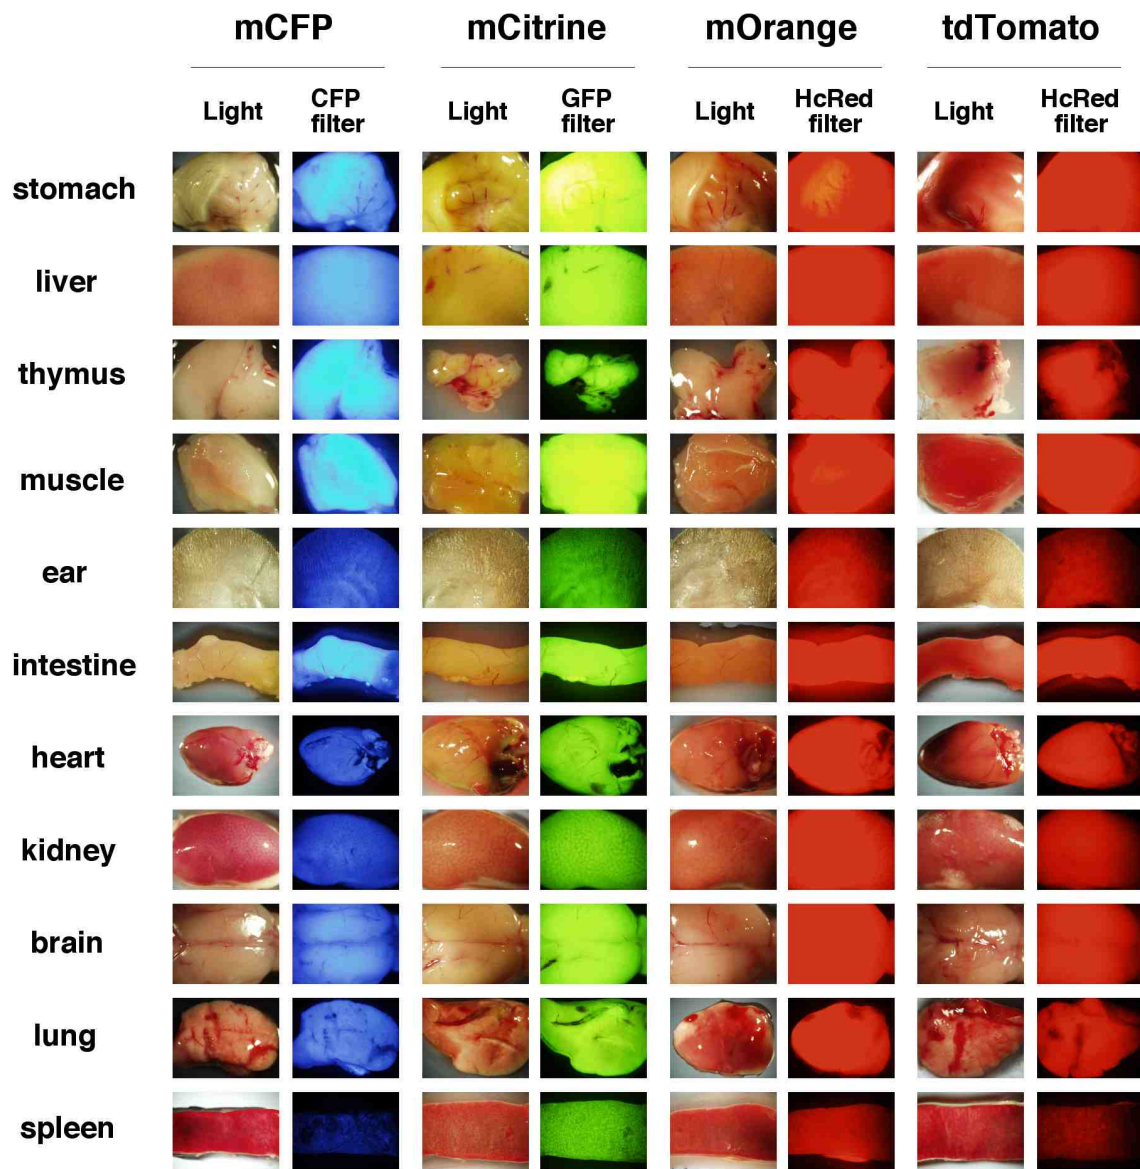

**Supplementary Figure S5.** Ubiquitous and strong fluorescence expression in tissues of “CAG-fluorescent gene-polyA” transgenic mice generated via PITT. In all transgenic mice, the transgene is located at the *Rosa26* locus with a single copy configuration.

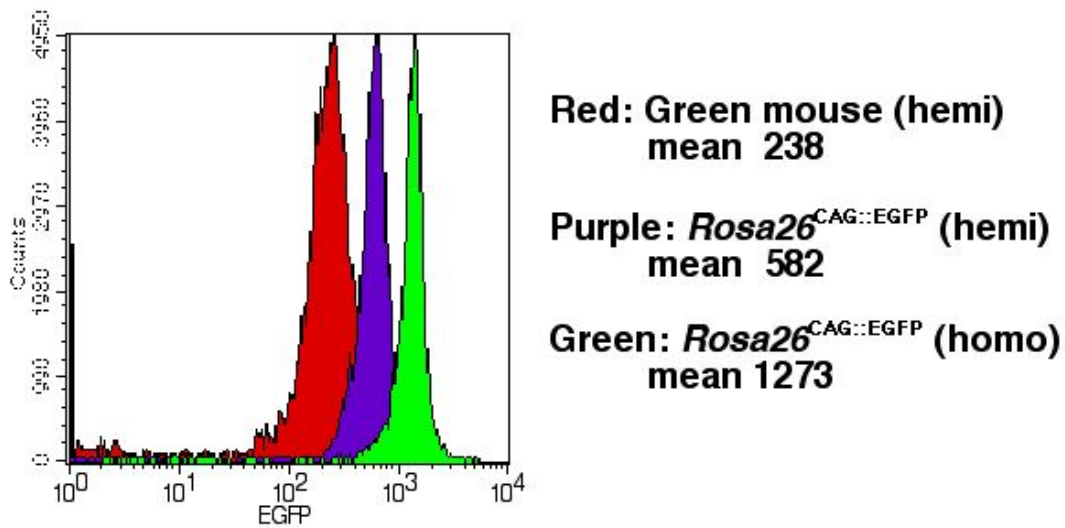

**Supplementary Figure S6.** EGFP fluorescence intensities in spleen cells. Fluorescence intensities were compared between *Rosa26*<sup>CAG::EGFP</sup> mice (hemizygote and homozygote) and commercially available EGFP transgenic mouse (green mouse; hemizygote). The spleen cells from *Rosa26*<sup>CAG::EGFP</sup> mice exhibited brighter EGFP fluorescence compared with the green mouse.



## Supplementary Tables

### Supplementary Table S1. Primers used in the present study.

---

|      |                                                          |
|------|----------------------------------------------------------|
| #142 | AAGAAGACAGGGCCAGGTTT                                     |
| #143 | ATGGTCCTGCTGGAGTTCGT                                     |
| #145 | TATGAAACAGCCCCCTGCT                                      |
| #166 | ACCCGTGATATTGCTGAAGAG                                    |
| #169 | TAAAAGGATTTGCAGACTACGG                                   |
| M022 | TGAGCGGCTGCGGGGCGGGTGCAA                                 |
| M024 | CCTAAAGAAGAGGCTGTGCTTTGG                                 |
| M025 | ACCAGCTACCGGAGCAAGAAG                                    |
| M026 | GGTGGTGCAGATGAACTTCAG                                    |
| M053 | GGCGCGCCTCAGAGAGCCTCGGCTAGGTAG                           |
| M054 | GGCGCGCCTACGCCAACCAAAACACGC                              |
| M055 | GGCGCGCCGACGTTTCCGACTTGAGTTG                             |
| M056 | GGCGCGCCAAGACTGGAGTTGCAGATCACG                           |
| M057 | GGCGCGCCTTCTGGGCAGGCTTAAAGG                              |
| M058 | GGCGCGCCAGCTACAGCCTCGATTGTGG                             |
| M059 | GGCGCGCCGTGTTGTTGAGCCACTGAGAATG                          |
| M060 | GGCGCGCCGTCCTGACCATCATGCCTCTG                            |
| M124 | CGTAAGTTATGTAACGCGGAACCTC                                |
| M132 | CATTTGTGGGCTGTTTACCAAC                                   |
| M153 | GCTCTAGACCCTGAGTTATAAGTCCTCAAG                           |
| M154 | CGGAATTCCTTGGTTTCTTGCAGTATG                              |
| M155 | GGCGCGCCTGTGCTTGTATGAATGTCCATGTAC                        |
| M159 | GCAAGGCGATTAAGTTGGGTAAC                                  |
| M194 | AAGAAGGCACATGGCTGAATATC                                  |
| M195 | CATCAAGGAAACCCTGGACTACTG                                 |
| M272 | CAGGAAACAGCTATGACC                                       |
| M273 | TCAGTAAGGGAGCTGCAGTGG                                    |
| M274 | CGATGGAAAATACTCCGAGGC                                    |
| M322 | TGCGCAACTGTTGGGAAG                                       |
| M372 | GTTGCTGGTGAAGACGTTACAC                                   |
| M373 | GAAAAGAGACACCGAACCACAC                                   |
| M374 | GCTTGTTATGCTGACAAGTGTGA                                  |
| M375 | GAGGCTAGAAGCTGGTGTAAATTG                                 |
| M376 | TGCATTCTAGTTGTGGTTTGTCC                                  |
| M393 | GGCGCGCCACTGTGGCGTGTGAGGAGAC                             |
| M394 | GGCGCGCCTGCAGGCAAGGACAGCTTC                              |
| M395 | GGCGCGCCTCATGTTAGGGAAATCCGAAG                            |
| M396 | GGCGCGCCTCTCCACTGCATTCCAGACC                             |
| M397 | GGCGCGCCAACACAGCCTGAGTTCGGTC                             |
| M398 | GGCGCGCCTCCAGCACCTCTACCACATG                             |
| M399 | GGCGCGCCTATGGGTCCAAACTGCCTTG                             |
| M400 | GGCGCGCCGTGAATGTGTGTCTGTGCCTG                            |
| M401 | GTACATAGCTGTGGGCTACC                                     |
| M402 | CCATCATAGCCATGCTGCTC                                     |
| M515 | GCTGTTTCACTGGTTATGCG                                     |
| M581 | GCGAGTTGATAGCTGGCTG                                      |
| M730 | GATAACTTCGTATAGCATAACATTATACGAAGTTATACGTCCACATATACCTGCCG |
| M731 | GAATTATTCGTATAGCATAACATTATACGAAGTTATACGTCCACATATACCTGCCG |
| M732 | GATAACTTCGTATAGCATAACATTATAGCAATTTATACGTCCACATATACCTGCCG |
| M733 | GAATTATTCGTATAGCATAACATTATAGCAATTTATACGTCCACATATACCTGCCG |
| M734 | GATAACTTCGTATAATGTATGCTATACGAAGTTATGAAAAGTGCCACCTGACGTC  |
| M735 | GATAACTTCGTATAATGTATACTATACGAAGTTATGAAAAGTGCCACCTGACGTC  |
| M736 | GATAACTTCGTATAAAGTATCCTATACGAAGTTATGAAAAGTGCCACCTGACGTC  |

---

**Supplementary Table S2.** Targeted transgenesis by RMCE in embryonic stem cells

| Exp. | Plasmid transfected | Promoter-less reporter gene | Locus         | Method             | Colonies examined | Correct integration | Efficiency (%) |
|------|---------------------|-----------------------------|---------------|--------------------|-------------------|---------------------|----------------|
| 1    | pAJK                | lacZ                        | <i>H2-Tw3</i> | electroporation    | 48                | 11                  | 22.9           |
| 2    | pA748               | EGFP                        | <i>H2-Tw3</i> | electroporation    | 72                | 19                  | 26.4           |
| 3    | pA617               | EYFP-nuc                    | <i>H2-Tw3</i> | electroporation    | 96                | 37                  | 38.5           |
| 4    | pA617               | EYFP-nuc                    | <i>H2-Tw3</i> | lipofectamine 2000 | 24                | 9                   | 37.5           |
| 5    | pAJK                | lacZ                        | <i>H2-Tw3</i> | lipofectamine 2000 | 564               | 116                 | 20.6           |
| 6    | pAMF                | lacZ                        | <i>H2-Tw3</i> | lipofectamine 2000 | 427               | 141                 | 33.0           |
| 7    | pAMF                | lacZ                        | <i>Rosa26</i> | lipofectamine 2000 | 358               | 84                  | 23.5           |
| 8    | pAKB                | lacZ                        | <i>Rosa26</i> | lipofectamine 2000 | 367               | 123                 | 33.5           |
| 9    | pAJK                | lacZ                        | <i>Rosa26</i> | lipofectamine 2000 | 560               | 136                 | 24.3           |
| 10   | pA748               | EGFP                        | <i>H2-Tw3</i> | lipofectamine 2000 | 24                | 24                  | <b>100.0</b>   |
| 11   | pA748               | EGFP                        | <i>Rosa26</i> | lipofectamine 2000 | 24                | 24                  | <b>100.0</b>   |

In all experiments, transfected cells were selected with hygromycin. The presence of clones with correct integrations was checked by PCR that amplified the junction regions (for experiment [exp.] 1 - 4), or by the X-gal staining (for exp. 5 - 9). Regarding exp. 10 and 11, EGFP-positive and hygromycin-resistance clones were picked and checked by PCR.

**Supplementary Table S3.** Survival rates of embryos after injection of Cre expression plasmid.

| Concentration of Cre plasmid (ng/ $\mu$ l) | Eggs injected | Normal <sup>a</sup> | 2-cell (%) <sup>b</sup> | 4-cell (%) <sup>b</sup> | 8-cell (%) <sup>b</sup> | Morula (%) <sup>b</sup> | Blastocyst (%) <sup>b</sup> |
|--------------------------------------------|---------------|---------------------|-------------------------|-------------------------|-------------------------|-------------------------|-----------------------------|
| 10                                         | 25            | 22                  | 17 (77)                 | 15 (68)                 | 9 (41)                  | 9 (41)                  | 7 (32)                      |
| 5                                          | 25            | 23                  | 23 (100)                | 23 (100)                | 20 (87)                 | 19 (83)                 | 17 (74)                     |
| 2.5                                        | 25            | 25                  | 25 (100)                | 25 (100)                | 25 (100)                | 25 (100)                | 20 (80)                     |
| 1                                          | 20            | 19                  | 19 (100)                | 19 (100)                | 19 (100)                | 19 (100)                | 17 (89)                     |
| control (no injection)                     | 10            | -                   | 10 (100)                | 10 (100)                | 10 (100)                | 10 (100)                | 10 (100)                    |

<sup>a</sup> Number of embryos free of abnormalities just after injection.

<sup>b</sup> (Number of normal embryos) / a \* 100

**Supplementary Table S4.** Survival rates of embryos after injection of donor plasmid and Cre expression plasmid.

| Concentration of plasmids                  | Eggs injected | Normal <sup>a</sup> | 2-cell<br>(%) <sup>b</sup> | 4-cell<br>(%) <sup>b</sup> | 8-cell<br>(%) <sup>b</sup> | Morula (%) <sup>b</sup> |
|--------------------------------------------|---------------|---------------------|----------------------------|----------------------------|----------------------------|-------------------------|
| Cre 5 ng/ $\mu$ l                          | 25            | 25                  | 23 (92)                    | 23 (92)                    | 18 (72)                    | 18 (72)                 |
| Cre 5 ng/ $\mu$ l + pAOF 5 ng/ $\mu$ l     | 25            | 20                  | 15 (75)                    | 14 (70)                    | 14 (70)                    | 14 (70)                 |
| Cre 5 ng/ $\mu$ l +<br>pAOF 10 ng/ $\mu$ l | 25            | 23                  | 18 (78)                    | 17 (74)                    | 17 (74)                    | 10 (43)                 |
| Cre 5 ng/ $\mu$ l +<br>pAOF 20 ng/ $\mu$ l | 25            | 20                  | 10 (50)                    | 10 (50)                    | 8 (40)                     | 6 (30)                  |
| pAOF 20 ng/ $\mu$ l                        | 25            | 22                  | 21 (95)                    | 18 (82)                    | 18 (82)                    | 18 (82)                 |
| injection buffer only                      | 10            | 10                  | 10 (100)                   | 10 (100)                   | 10 (100)                   | 10 (100)                |
| no injection                               | 10            | 10                  | 10 (100)                   | 10 (100)                   | 10 (100)                   | 9 (90)                  |

<sup>a</sup> Number of embryos free of abnormalities just after injection

<sup>b</sup> (Number of normal embryos) / a \* 100

**Supplementary Table S5.** Frequency of germline transmission from individual founders.

| Founder mice | Plasmid from which transgene was derived | Locus         | Sex    | Frequency of germline transmission (%) <sup>a</sup> |
|--------------|------------------------------------------|---------------|--------|-----------------------------------------------------|
| 1            | pAMF                                     | <i>H2-Tw3</i> | male   | 4/7 (57)                                            |
| 2            | pAMF                                     | <i>H2-Tw3</i> | female | 15/24 (63)                                          |
| 3            | pAMG                                     | <i>Rosa26</i> | female | sterile                                             |
| 4            | pAMJ                                     | <i>Rosa26</i> | male   | 6/17 (35)                                           |
| 5            | pANQ                                     | <i>Rosa26</i> | female | 8/20 (40)                                           |
| 6            | pAOB                                     | <i>Rosa26</i> | male   | 0/7 (0)                                             |
| 7            | pAOF                                     | <i>Rosa26</i> | female | 1/23 (4)                                            |
| 8            | pAOF                                     | <i>Rosa26</i> | female | 8/16 (50)                                           |
| 9            | pAOK                                     | <i>Rosa26</i> | female | 5/8 (63)                                            |
| 10           | pAOL                                     | <i>Rosa26</i> | male   | 0/10 (0)                                            |
| 11           | pAOL                                     | <i>Rosa26</i> | female | 2/5 (40)                                            |
| 12           | pAOL                                     | <i>Rosa26</i> | male   | 2/19 (11)                                           |
| 13           | pAOL                                     | <i>Rosa26</i> | male   | 2/17 (12)                                           |
| 14           | pAOM                                     | <i>Rosa26</i> | male   | 8/14 (57)                                           |
| 15           | pAOM                                     | <i>Rosa26</i> | male   | 5/20 (25)                                           |
| 16           | pAOM                                     | <i>Rosa26</i> | female | 2/8 (25)                                            |
| 17           | pAOT                                     | <i>Rosa26</i> | female | 3/9 (33)                                            |
| 18           | pAOT                                     | <i>Rosa26</i> | female | 3/13 (23)                                           |
| 19           | pAOT                                     | <i>Rosa26</i> | female | 1/8 (13)                                            |
| 20           | pAOU                                     | <i>Rosa26</i> | female | 3/10 (30)                                           |
| 21           | pAOU                                     | <i>Rosa26</i> | female | 6/13 (46)                                           |

Germline transmission was analyzed by PCR using genomic DNA isolated from the ears of progeny mice as template.

<sup>a</sup> Number of F1 progeny with germline transmission / total F1 mice born
